# **Biodiversity and Antimicrobial Potential of Bacterial Endophytes from Halophyte *Salicornia brachiata***

1 **Sanju Singh<sup>1,2‡</sup>, Vishal Ghadge<sup>1,2‡</sup>, Pankaj Kumar<sup>1,2‡</sup>, Doniya Elze Mathew<sup>2,3</sup>, Asmita**  
2 **Dhimmar<sup>1,2</sup>, Harshal Sahastrabudhe<sup>1,2</sup>, Yedukondalu Nalli<sup>1</sup>, Mina R. Rathod<sup>1</sup>, Pramod B.**  
3 **Shinde<sup>1,2\*</sup>**

4 <sup>1</sup>Natural Products & Green Chemistry Division, CSIR-Central Salt and Marine Chemicals Research Institute (CSIR-  
5 CSMCRI), Council of Scientific and Industrial Research (CSIR), Bhavnagar-364002, Gujarat, India

6 <sup>2</sup>Academy of Scientific and Innovative Research (AcSIR), Ghaziabad-201002, India

7 <sup>3</sup>Applied Phycology and Biotechnology Division, CSIR-Central Salt and Marine Chemicals Research Institute (CSIR-  
8 CSMCRI), Council of Scientific and Industrial Research (CSIR), Bhavnagar-364002, Gujarat, India.

9 <sup>‡</sup>These authors contributed equally.

10

11 **\*Correspondence:**

12 Email: pramodshinde@csmcri.res.in

13

14 **ABSTRACT**

15 Untapped natural habitats like halophytes, marsh land, and marine environment are suitable arena for chemical ecology  
16 between plants and microbes having environmental impact. Endophytes constitute an ecofriendly option for the  
17 promotion of plant growth and to serve as sustainable resources of novel bioactive natural products. The present study  
18 focusing on biodiversity of bacterial endophytes from *Salicornia brachiata*, led to isolation of around 350 bacterial  
19 endophytes. Phylogenetic analysis of 63 endophytes revealed 13 genera with 29 different species, belonging to 3 major  
20 groups: Firmicutes, Proteobacteria and Actinobacteria. 30% isolates belonging to various genera demonstrated broad-  
21 spectrum antibacterial and antifungal activities against a panel of human, plant, and aquatic infectious agents. An  
22 endophytic isolate *Bacillus amyloliquefaciens* 5NPA-1, exhibited strong in-vitro antibacterial activity against human  
23 pathogen *S. aureus* and phytopathogen *X. campestris*. Investigation through LC-MS/MS-based molecular networking  
24 and bioactivity-guided purification led to the identification of three bioactive compounds belonging to lipopeptide  
25 class on the basis of <sup>1</sup>H- and <sup>13</sup>C-NMR and MS analysis. To our knowledge, this is the first report studying bacterial  
26 endophytic biodiversity of *Salicornia brachiata* and isolation of bioactive compounds from its endophyte. Overall,  
27 the present study provides insights into the diversity of endophytes associated with the plants from the extreme  
28 environment as rich source of metabolites with remarkable agricultural applications and therapeutic properties.

29

30 **Keywords:** *Salicornia brachiata*, Endophytes, Chemical ecology, Bioactive compounds, Lipopeptides.

31

## 32 INTRODUCTION

33 Ecological interactions are responsible for providing prime ecosystem services. Plant mediated interactions and  
34 structure of natural communities go hand in hand as they potentially link organisms of different trophic levels and add  
35 chemical complexity within communities leading to surging catalog of compounds. Endophytes, impart protection to  
36 plants against various abiotic or biotic stress tolerance by production of plant hormones, bioavailability of nutrients,  
37 and antagonistic action to phytopathogens in turn, sustaining on the nutrients provided by plants thereof [1].  
38 Endophytic bacteria facilitates plant growth and developments through various processes including nitrogen fixation,  
39 phosphate solubilization, production of hormones and siderophores, and decreasing ethylene concentration [2,3].  
40 Along with host plant-growth cycle, endophytes also improvise their survival mechanisms during their continuous  
41 efforts to live in the host tissues [4]. Biological control within host is mediated by endophytes that promotes plant  
42 growth by protecting against the attack of phytopathogens, facilitated by the production of siderophores, antibiotics  
43 or bacteriocins [5]. It has been proved that bioactive compounds derived from plants are mostly secondary metabolic  
44 products of microbes inhabiting inside the plants symbiotically defined as endophytes [6]. Predominantly,  
45 actinobacterial and bacterial endophytes contribute heavily in plant growth promotion and agriculture management  
46 strategies via production of metabolites such as aromatic compounds, lipopeptides, plant hormones, polysaccharides,  
47 and several enzymes linked to phenylpropanoid metabolism [7].

48 Halophytes are plants that thrive in saline environment with salinity upto 200 mM concentration [8]. Endophytic  
49 bacteria and fungi isolated from halophytes aid hosts by altering plant hormone status and uptake of nutrient elements  
50 and/or modulating the production of reactive oxygen species through different mechanisms [9,10]. Strains of *Bacillus*  
51 *amyloliquefaciens* are reported to enhance plant growth promotion and also provide defense benefits against  
52 phytopathogens like *Phytophthora parasitica* var. *nicotiana*, *Fusarium oxysporum* sp. , *F. graminearum*, *F. solani*,  
53 *Alternaria alternate* etc. [11,12]. Beneficial metabolites produced due to ecological interactions between endophyte-  
54 plant can be harnessed and employed for multifaceted applications in arena such as agriculture, medicine,  
55 bioremediation, and biodegradation. Despite their beneficial characters, the research regarding endophytes from plants  
56 inhabiting extreme environments is still at an early stage with respect to diversity of endophytes, their functional roles,  
57 and bioprospecting for bioactive compounds.

58 *Salicornia brachiata* is a halophyte with medicinal properties having salty marsh lands as the natural habitat getting  
59 exposed to extremities of salinity, heat, temperature, and humidity [13]. *S. brachiata* was reported to harbor plant-  
60 growth promoting microorganisms [14,15]. It can be hypothesized that *S. brachiata* being a plant inhabiting in extreme  
61 environment, must have evolved ways to harbor diverse kinds of endophytes apart from plant-growth promoters and  
62 to employ those endophytes for protection from herbivores and pests including phytopathogenic fungi and insects,  
63 competing for nutrients including trace elements. Motivated by this hypothesis, present study investigated diversity  
64 of bacterial endophytes associated with the halophyte *S. brachiata* sampled at three distinct locations at Gujarat coast,  
65 India. Further, their bioactive potential was also studied against a panel of human, plant, and aquatic infectious agents.  
66 Repeated chromatographic separation resulted in isolation of three compounds from the endophyte *B.*

67 *amyloliquefaciens*. This may be the first comprehensive study evaluating bacterial endophytic biodiversity of the  
68 halophyte *Salicornia brachiata*.

## 69 **METHODS**

### 70 **Collection of plant material and isolation of endophytes**

71 Healthy and fresh plant samples of *S. brachiata* were collected randomly from three different sites i.e. New port (N  
72 21° 45' 15.7", E 072° 14' 01.4"), Sartanpar port (N 21° 17' 52.1", E 072° 66' 25.5"), Victor port (N 20° 58' 53.2", E  
73 071° 33' 21.2"), located along Gujarat coast, India (**Figure 1**). Samples were placed in sample bags and stored on  
74 icebox right after sampling to preserve microbial flora and then the plant material was transported to laboratory and  
75 processed immediately.

76 The plant material was surface sterilized followed by different treatments to enhance the probability of maximum  
77 number of novel bacterial or actinobacterial species. Surface sterilization of the samples was carried out by reported  
78 method [16]. Sterilized samples were aseptically fragmented into small pieces and directly placed on eight selective  
79 media prepared with cycloheximide and nystatin at concentration of 50 mg/ml to inhibit fungal growth. Sterilized  
80 samples were given six different pre-treatments (**Table I**) and plates were incubated at 30 °C for 2 to 8 weeks. Control  
81 plates inoculated with last wash of sterilization procedure was incubated to check effectiveness of surface sterilization  
82 in triplicate. Periodic growth analysis and subsequent sub-culturing for purification of isolates was performed.  
83 Glycerol stocks of purified strains were prepared and stored at -80 °C.

### 84 **Identification of endophytes**

85 DNA isolation was performed using reported protocol with some modification [17]. Briefly, 2 ml of 24 h grown  
86 bacterial culture (48 h for slow growing bacteria) was centrifuged for 2 min at 13000 rpm. Cell pellet was resuspended  
87 in 600 µl TE buffer (10 mM Tris base, 1 mM EDTA, pH 8.0). 100 µl of 10 mg/ml lysozyme was added and incubated  
88 at 37 °C for 1 h followed by addition of 20 µl of 20 mg/ml Proteinase K and incubation at room temperature for further  
89 1 h. After incubation, 200 µl of 10% SDS was added and kept at 55 °C for 1 h followed by purification through  
90 extraction of aqueous phase with phenol : chloroform : isoamyl alcohol (24:24:1). DNA was precipitated using 3M  
91 sodium acetate and chilled isopropanol and the obtained DNA pellet was washed by ethanol. 16S rRNA amplification  
92 was done using universal primer sequences of FD<sub>1</sub> (5'-GAGTTTGATCCTGGCTCA-3') and RP<sub>2</sub> (5'-  
93 ACGGCTAACTTGTTACGACT-3'). Reaction mixture, consisting of DNA template – 1 µl (50 ng/µl), Primers – 0.5  
94 µl of 10 µM, dNTP – 0.2 mM and Taq polymerase – 1.25 units, was prepared and the reaction was performed in  
95 Thermocycler (Bio-Rad T100) with conditions: Initial denaturation – 95 °C for 5 min, 34 cycles of 95 °C for 30 s, 58  
96 °C for 30 s and 55 °C for 1 min and final amplification for 5 min.

97 Amplification of 16S rRNA gene was confirmed by gel electrophoresis; subsequently PCR products were purified  
98 with Qiagen PCR purification kit and sequenced by Macrogen Inc. Korea. The obtained sequences were trimmed to  
99 align in BioEdit software (version 7.0.5.3) [18] and consensus sequence created was searched in NCBI GenBank  
100 database using BLAST. Further, 16S rRNA sequences were aligned and used to construct maximum likelihood  
101 phylogenetic tree using molecular evolutionary genetic analysis MEGA 6 software [19].

## 102 **Statistical data analysis**

103 Simpson index of diversity and Shannon-Wiener's diversity index were calculated to determine endophytic diversity  
104 obtained from samples of all the three locations [20].

105 Simpson's index of diversity (D) gives the probability that two individuals selected at random will belong to the same  
106 species and was calculated using formula as given in the following equation:

$$107 \quad D = 1 - \sum pi^2$$

108 Shannon-Wiener diversity index (H) determines actual diversity of the bacterial endophytes, and was calculated using  
109 the following equation:

$$110 \quad H = -\sum pi(\ln pi)$$

111 where  $p_i = n/N$ ;

112 n = total number of organisms of species 'i'.

113 N = total number of organisms of all species.

114 Shannon evenness (E) was calculated as  $H/H_{\max}$ , where  $H_{\max} = \ln(S)$ , with S as the total number of species in the  
115 sample. Further, to determine qualitative wealth species richness was also calculated by  $S/\sqrt{N}$ .

## 116 **Antimicrobial potential of endophytes**

117 A panel of 8 reference human, plant, and marine pathogens comprising of *Staphylococcus aureus* MCC 2043, *Bacillus*  
118 *subtilis* MCC 2049, *Mycobacterium smegmatis* MTCC 6, *Escherichia coli* MCC 2412, *Candida albicans* MCC 1152,  
119 *Xanthomonas campestris* NCIM 5028, *Fusarium oxysporum* NCIM 1008, *Alteromonas macleodii* NCIM 2815 was  
120 employed to determine bioactive potential of all the endophytic isolates. 10 ml culture of endophytes in 50 ml tubes  
121 was done for a period of 14 days at 30 °C, 180 rpm shaking condition, in-between assessing it at an interval of 7 days  
122 for the antimicrobial activity. Whole cell culture and supernatant (obtained after centrifugation) were used to perform  
123 well diffusion assay [21] for determination of bioactivity.

## 124 **Preparation of crude extracts**

125 In order to confirm endophytes play important role in survival of halophyte *S. brachiata* in extreme climate by  
126 protecting against pathogens, crude extracts of isolates which were found bioactive in primary screening were  
127 prepared. Briefly, 250 ml culture broth in 1000 ml Erlenmeyer flask in particular medium and incubation conditions  
128 specific for an isolated strain was done. After incubation period, culture broths were extracted twice with equal volume  
129 of ethyl acetate. Organic phase was collected over anhydrous sodium sulfate and concentrated under rotary evaporator  
130 to yield dark-brown colored crude extracts. The activity of crude extracts of isolates bioactive against *S. aureus* MCC  
131 2043 and *X. campestris* NCIM was confirmed through disk diffusion assay by loading 1 mg of extract on the disk  
132 following Clinical and Laboratory Standards Institute (CLSI) protocols [22].

## 133 **LC-MS/MS based molecular networking**

134 LC-MS/MS data of the crude extract of *B. amyloliquefaciens* 5NPA-1 was studied with GNPS (Global natural products  
135 social molecular networking) (<https://gnps.ucsd.edu>) [23]. Raw data received from Agilent 6545 Q-TOF LC/MS was  
136 converted into GNPS compatible mzXML format using MSconvert application (version 3.0.19317-0ef6e44d0) in

137 Proteowizard suit [24]. The converted file was uploaded to GNPS server (massive.ucsd.edu) using WinSCP FTP  
138 client. Molecular networking was run as classical molecular networking work flow (METABOLOMICS-SNETS-V2)  
139 with activated MS-Cluster. Parameters for input algorithm were set as: precursor ion mass tolerance 2.0 Da, fragment  
140 ion mass tolerance 0.5 Da, minimum cosine score for an edge formation by two consensus MS/MS spectra as 0.7,  
141 minimum number of common fragment ions as 6 (no. of fragment shared by two separate consensus MS/MS spectra  
142 in order to be connected by an edge in the molecular network), minimum cluster size was 2, and edges between two  
143 nodes were considered only if both nodes were within top 10 most similar nodes of each other. Molecular network  
144 file was downloaded in GraphML format and visualized using Cytoscape (version 3.7.2) [25].

#### 145 **TLC bioautography**

146 Ethyl acetate extract of endophyte *B. amyloliquefaciens* 5NPA-1 was subjected to thin layer chromatography (TLC)  
147 analysis over analytical aluminium silica gel 60 TLC plate for separation of metabolites to obtain  $R_f$  value of active  
148 fraction. The crude extract was dissolved in methanol to get a concentration of 10 mg ml<sup>-1</sup> and 1 mg was loaded on  
149 TLC plate which was developed with solvent system comprising of methanol and chloroform in the ratio 12:88.  
150 Separate bands were observed under short wavelength UV light and their  $R_f$  values were calculated. To perform  
151 bioautography, 1.5 ml of 1% mueller hinton agar (MHA) was spread on the developed TLC plate of size 10 × 2 cm  
152 under sterile environment of biosafety cabinet and 50 µl of log phase culture of *S. aureus* MCC 2043 was spread with  
153 the help of sterile spreader. After incubation for 24 h at 30 °C, the plate was visualized by spraying  
154 iodinitrotetrazolium chloride solution (INT, 2 mg ml<sup>-1</sup>) pink color on plates signified cell growth whereas bands with  
155 clear zone indicated inhibition of cell growth.  $R_f$  values of the bands with clear zone were recorded [26].

#### 156 **Isolation and identification of bioactive molecules**

157 Purification of compounds was carried out by separating 50 mg of crude extract on preparative TLC plates (Kieselgel  
158 60 F<sub>254</sub>, 25 mm, Merck) using the same solvent system as above. Based on TLC bioautography, the active portion was  
159 selectively scrapped and dissolved in methanol. The supernatant was concentrated on rotary evaporator to obtain 15  
160 mg of yellow, viscous oil (5-PTLC2), which was analyzed by HPLC. Further, <sup>1</sup>H-NMR spectrum (Bruker, Avance II  
161 500 MHz in CD<sub>3</sub>OD) of 5-PTLC2 was acquired in order to identify the class of compounds. Additionally, to purify  
162 active compounds, the crude extract (2 g) was fractionated by MPLC (C18 RP-silica gel) eluting with aqueous MeOH  
163 (30% to 100%) resulting in the collection of 18 fractions (fr. 1–fr. 18) which were evaluated for antimicrobial activity  
164 against *S. aureus* MCC 2043. Fractions 11 and 13 containing bioactive compounds were further chromatographed on  
165 semi-preparative HPLC (Dionex Ultimate 3000, Thermo Scientific) using gradient mixtures of acetonitrile–water (4:1  
166 to 9:1) on YMC column (YMC-Triart C18, 5 µm, 250 × 10 mm I.D.) to yield three compounds (1–3). The three  
167 compounds were further characterized by MALDI-MS and MALDI-MS/MS (Applied Biosystems 4800 MALDI  
168 TOF–TOF analyzer) and NMR (JEOL 600 MHz).

169

## 170 **RESULTS**

### 171 **Collection of plant material and isolation of endophytes**

172 *S. brachiata* samples collected from three different sites along Gujarat coast (**Fig. 1**) were processed using eight  
173 different media with six variable pretreatments resulting in isolation of 336 endophytes differentiated on the basis of  
174 morphological characters (**Fig. S1**). The high number of isolates obtained were also found to be equally diversified.  
175 Also, effectiveness of surface sterilization was established as no growth was observed on the negative control plate  
176 even when incubated for a month long period. Maximum number of bacterial isolates were obtained on medium  
177 supporting fast growing microbes i.e. 81 isolates collectively from NA, ZMA, and TSA; 52 from SCA; 52 from ISP2;  
178 50 from AIA; 70 from ISP4; 31 from TWYA (**Fig. S2**). The diverse group of isolated actinobacteria preferred ISP4  
179 media for their growth and pigment production.

### 180 **Identification of endophytes**

181 Out of 336 isolates, 63 isolates obtained from different media were identified on the basis of molecular phylogeny by  
182 16S rRNA sequencing. Evolutionary relationships of different endophytes obtained from *S. brachiata* were inferred  
183 from maximum likelihood phylogenetic tree (**Fig. 2**). On the basis of 16S rRNA sequencing results, the most  
184 predominant as well as diverse genera identified was *Bacillus* being 76% of the isolates with 15 different species. The  
185 remaining percentage accounted for various genera of actinomycetes or bacteria like *Isoptericola*, *Paenibacillus*,  
186 *Nocardopsis*, *Rhodococcus*, *Salinicola*, *Jonesia*, *Nitratireductor*, *Enterococcus*, *Streptomyces*, *Micromonospora*,  
187 *Pseudomonas* and *Marinilactibacillus* (**Table II**).

### 188 **Statistical data analysis**

189  $\alpha$ -diversity indexes, i.e. Shannon- Wiener diversity index and Simpson's index of diversity and their components;  
190 richness and evenness were used to determine diversity of the endophytic community isolated from *S. brachiata*  
191 sampled from three different locations. Shannon-Wiener diversity index (H) was calculated as 3.028, indicating high  
192 diversity within endophytes. Species richness indicating abundance of the species in a sample was found to be  
193 3.615, viz., greater the value higher the richness. Shannon evenness measures relative abundance of different species  
194 contributing to richness of a sample, was calculated as 0.899 signifying an even community structure [20]. In  
195 agreement with aforementioned data, Simpson's index of diversity (D) of 0.931, demonstrate a high diversity of  
196 endophytes harbored by the host halophyte (**Table III**).

### 197 **Antimicrobial potential of endophytes**

198 From the primary screening study, a total of 101 isolates were found to exhibit broad-spectrum antimicrobial activity  
199 against one or the other pathogen from panel of pathogens tested. 8 isolates were found to be active against *M.*  
200 *smegmatis* MTCC 6; 20 against *S. aureus* MCC 2043; 51 against *X. campestris* NCIM 5028; 42 against *A. macleodii*  
201 NCIM 2815; 12 against *C. albicans* MCC 1152; 14 against *F. oxysporum* NCIM 1008; 19 against *B. subtilis* MCC  
202 2049; 5 against *E. coli* MCC 2412 (**Fig 3a**). It was observed that some endophytes displayed inhibition activity against  
203 two or more pathogens (**Table IV**).

### 204 **Preparation of crude extracts and**

205 Crude extract of bioactive strains were prepared through solvent-solvent extraction method. Bioactivity of isolates  
206 active against *S. aureus* MCC 2043 and *X. campestris* NCIM 5028 was confirmed by disk diffusion assay (**Fig. 3b**),  
207 according to the guidelines of CLSI. The isolate *Bacillus amyloliquefaciens* 5NPA-1 exhibited a prominent zone of  
208 inhibition of 29 mm and 14 mm against pathogens *S. aureus* MCC 2043 and *X. campestris* NCIM 5028 respectively,  
209 serving as a potential isolate for isolation of bioactive compounds which are beneficial to plants as well as humans.

#### 210 **LC-MS/MS based molecular networking**

211 Molecular networking of crude extract of *B. amyloliquefaciens* 5NPA-1 using the GNPS platform was found to consist  
212 of 24 nodes grouped into 4 clusters. Largest cluster had 5 nodes, which was annotated as surfactin by automatic  
213 dereplication using MS/MS spectral libraries available at GNPS (**Fig. 4**). The network resulted into identification of  
214 3 types of surfactin with respect to variations in length of fatty acid chain. Further, no specific networks denoting other  
215 class compounds were observed, supporting the idea that lipopeptides in *B. amyloliquefaciens* 5NPA-1 could be  
216 responsible for the bioactivity.

#### 217 **TLC Bioautography**

218 In order to identify bioactive metabolites, TLC plate was developed to obtain 7–8 bands as observed under short UV  
219 radiations (254 nm wavelength). Developed TLC plate when overlaid with *S. aureus* MCC 2043 suspension on 1%  
220 agar, displayed clear zone with no cell growth against pinkish background at  $R_f$  between 0.12 to 0.41 (**Fig. 5**).

#### 221 **Isolation and identification of bioactive molecules**

222 The active middle band (5-PTLC-2) obtained from TLC-bioautography was scrapped in order to acquire  $^1\text{H-NMR}$   
223 spectrum to identify the chemical class of the compounds.  $^1\text{H-NMR}$  spectrum of PTLC-2 exhibited signals for a long  
224 aliphatic alkyl chain at  $\delta_{\text{H}}$  1.29,  $\text{CH}_3$  groups at  $\delta_{\text{H}}$  0.85–1.00, an oxy-methine at  $\delta_{\text{H}}$  5.31, seven  $\alpha\text{-H}$  at  $\delta_{\text{H}}$  4.05–4.80,  
225 indicating lipopeptide nature of compounds present in the fraction PTLC2 (**Fig. 6**). HPLC-DAD chromatogram of  
226 PTLC-2 revealed three peaks suggesting it to be a mixture of three compounds (**Fig. S3**). Hence, for their targeted  
227 separation, the crude ethyl acetate (EtOAc) extract was subjected to MPLC followed by HPLC (**Fig. S4**) resulting  
228 three compounds **1**, **2**, and **3** (**Fig. 7a**). The MALDI-TOF-MS spectra of **1**, **2**, and **3** exhibited intense sodium adduct  
229  $[\text{M}+\text{Na}]^+$  ion peaks at  $m/z$  1031.2147, 1045.0100 and 1058.8456, respectively. Comparison of the MALDI-TOF-MS  
230 data of **1**, **2**, and **3** with those available in literature revealed that the purified compounds belonged to surfactin class  
231 with different number of  $\text{CH}_2$  units in fatty acid chain and subsequently identified as  $\text{C}_{13}$ -surfactin (**1**),  $\text{C}_{14}$ -surfactin  
232 (**2**), and  $\text{C}_{15}$ -surfactin (**3**) [27] (**Fig. S5,S6,S7**). To determine the sequence of the amino acids, the sodiated ions of **1**,  
233 **2**, and **3** were separately subjected to tandem MS experiment giving rise to spectra with diagnostic ion series containing  
234 C- and N-terminus. The MS/MS spectra of compounds **1**, **2**, and **3** displayed a major ion sequence of fragments  $m/z$   
235 707.4, 594.3, 481.2, 382.1, 267.1 corresponding to loss of (fatty acid)-Glu-Leu-Leu-Val-Asp-Leu-Leu from C-  
236 terminal region. Similarly, another major fragment ion series of **1** [ $m/z$  945.5, 832.5, 717.4, 618.4], **2** [ $m/z$  931.5,  
237 818.5, 702.4, 604.3], and **3** [ $m/z$  917.5, 804.4, 688.4, 590.3] confirmed the presence of amino acid residues sequence  
238 as Leu-Leu-Asp-Val-Leu-Leu-Glu-(fatty acid) from the N-terminal region. Taken together, the connection of the two  
239 series suggested that the surfactins **1**, **2**, and **3** contained the same heptapeptide sequence (fatty acid)-Glu-Leu-Leu-



240 Val-Asp-Leu-Leu (**Fig. S8,S9,S10**).  $^{13}\text{C}$  NMR chemical shifts allowed to differentiate branching of the hydroxy fatty  
241 acid side chain among the *normal* ( $\delta_{\text{C}}$  13.8, 22.0, 31.2), *iso* ( $\delta_{\text{C}}$  22.4, 22.4, 27.3, 38.4), and the *anteiso* ( $\delta_{\text{C}}$  11.1, and 19.0)  
242 chain types [28]. Based on this approach, the  $\beta$ -hydroxyl fatty acid chains were found to be mixtures of *iso*- $\text{C}_{10}\text{H}_{21}$  and  
243 *anteiso*- $\text{C}_{10}\text{H}_{21}$  in **1**; *n*- $\text{C}_{11}\text{H}_{23}$ , *iso*- $\text{C}_{11}\text{H}_{23}$ , and *anteiso*- $\text{C}_{11}\text{H}_{23}$  in **2**; and, *iso*- $\text{C}_{12}\text{H}_{25}$  and *anteiso*- $\text{C}_{12}\text{H}_{25}$  in **3**, respectively  
244 (**Fig. 7b**). On the basis of the previous studies, absolute configurations of amino acid units from N- to C-terminal of **1**,  
245 **2**, and **3** were assumed to be L-, L-, D-, L-, L-, D- and L-, respectively, and the C-3 configuration of fatty acid was  
246 assumed to be as *R* [29].

## 247 DISCUSSION

248 Endophytes, plant associated symbionts, have emerged as an interesting source for natural products because of their  
249 diversity in bioactive secondary metabolites. Halophytes are reported to overcome their abiotic and biotic stress with  
250 the help of metabolites, regulators or enzymes released from endophytes [30]. In this study, diversity of bacterial  
251 endophytes from *S. brachiata* was assessed and their probable role in host-plant interaction including identification of  
252 metabolites produced by one of the endophyte *B. amyloliquefaciens*. All endophytes were screened for antimicrobial  
253 potential against human, plant, and marine pathogens. To our knowledge this is a first comprehensive report regarding  
254 diversity of bacterial endophytes from *Salicornia brachiata* from Gujarat coast of India and investigation of their  
255 antimicrobial potential.

256 Surface sterilized plant material with six different pretreatments and eight different previously reported media resulted  
257 into a total of 336 endophytes delivering a quantitative idea about the bacterial diversity within the halophyte. The  
258 results indicated a mixed composition of the endophyte communities comprising majorly firmicutes followed by  
259 actinobacteria and proteobacteria. Studies on endophytic bacteria from different parts of halophytes *Salicornia*  
260 *europaea*, *Arthrocnemum macrostachyum* etc. have been performed previously and predominance of aforementioned  
261 phyla was observed [31,32]. Out of 336 endophytes, 63 isolates identified in the study represented 13 genera with 29  
262 different species. *Bacillus* as a dominant genus was observed with a diversity of around 15 different species. *Bacillus*  
263 sp. due to their better resilience is usually the dominant firmicute isolated from saline environments [30,33]. The  
264 statistical analysis showed a higher richness and evenness of species diversity among isolated endophytes. Amidst the  
265 endophytes obtained in our study from *S. brachiata*, genera *Bacillus*, *Isoptericola*, *Streptomyces*, *Salinicola*,  
266 *Rhodococcus* have already been reported from sister species of *Salicornia europaea* [32,34]. *Nocardiopsis*, *Jonesia*,  
267 *Nitratireductor*, *Paenibacillus*, *Micromonospora* are some genera from *S. brachiata* we report in our study.

268 It is well established that endophytes support plant ecological progression through production of various metabolites.  
269 Processes supported by these metabolites increases bioavailability of nutrients to host, tolerance against abiotic stress  
270 and strength to fight against biotic stress including pests and phytopathogens. Among the isolated strains in the study  
271 *Bacillus* sp. is predominantly reported to produce ACC deaminase enzymes to alleviate stress by ethylene, indole  
272 acetic acid and gibberellic acids promoting cell division and growth [30], phosphate solubilization enzymes, biological  
273 nitrogen fixation, siderophores and bioactive metabolites against phytopathogens [5,31,35]. Bioactive metabolites  
274 from *Bacillus* sp. include polyketides bacillomycin, fengycin, iturin, lichenysin, mycosubtilin, plipastatin,  
275 pumilacidin, and surfactin [36]. Hence, abundance of *Bacillus* endophytes can be validated due to its profuse chemical  
276 interactions with host plant. The strains *Salinicola* sp. and *Rhodococcus* sp. also display ACC deaminase activity

277 important for plant growth promotion events in stress conditions [34]. Moreover, endophytic *Salinicola* sp. isolated  
278 from *Spartina maritima* was reported to be an excellent producer of siderophores and contain heavy metal tolerant  
279 genes thereby supporting the plant to alleviate the toxic effect of heavy metals [37]. The actinobacterial genera of  
280 *Nocardiopsis* and *Isoptericola* [38] thrive in the saline conditions. Genetic makeup of *Nocardiopsis* is filled with  
281 megaplasmid genes encoding antibiotic productions like apoptolidin, lipopeptide biosurfactants, thiopeptides,  
282 griseusin D etc., heavy metal resistance and stress response including osmoregulation benefitting their survival in  
283 halophilic environment [39]. It can be said that the ecological stress within host plant stimulated production of such  
284 bioactive metabolites in *Nocardiopsis*. *Jonesia denitrificans* as the name suggests is reported to perform denitrification  
285 [40]. Various strains of *Streptomyces* are reported to exhibit phosphate solubilization property, ammonia production,  
286 enzymes production for breakdown of organic matter, PKS and NRPS gene clusters for production of bioactive  
287 compounds etc. which contributes to plant health either directly or indirectly [41]. These reports reflect direct plant-  
288 microbe interactions of the isolates obtained in study, further supporting their endophytic origin from halophyte.  
289 In-vitro screening of the isolates for bioactivity revealed one third of the population to be bioactive against one or  
290 more reference pathogen. This aligns with the work of Verma *et al.* who reported 60% of the endophytic actinobacteria  
291 isolates obtained from *Azadirachta indica* showed wide-spectrum antagonistic potential [42]. Given their metabolite  
292 productions, a large number of isolates exhibited inhibition of growth of plant pathogens *X. campestris* NCIM 5028,  
293 *F. oxysporum* NCIM 1008 and marine bacterial pathogen *A. macleodii* NCIM 2815. Inhibition of phytopathogens at  
294 such enormous amount indicates role of endophytes in defense mechanisms of host plant. Some of the isolates were  
295 found to inhibit *M. smegmatis* MTCC 6, *S. aureus* MCC 2043, etc., suggesting that the antimicrobial activity exhibited  
296 by plant *S. brachiata* [13] can be attributed to the bioactive metabolites secreted by inhabiting endophytes. The genus  
297 *Bacillus* was dominant in displaying activity against all indicator pathogens pertaining to its siderophore and bioactive  
298 lipopeptide production potential. Production of siderophores was reported from halotolerant *Bacillus* isolated from  
299 wheat seedlings, further it improve soil fertility increasing plant productivity in agriculture and also remediates toxic  
300 metals from human body [43]. *Bacillus* sp. have been isolated as endophytes from ginger, turmeric etc. and shows  
301 enormous antifungal properties and antibacterial properties due to the presence of cyclic lipopeptides [44].  
302 In the present work, along with endophytic biodiversity, an emphasis was also laid on isolate displaying activity  
303 against *S. aureus* MCC 2043, a common nosocomial pathogen and *X. campestris* NCIM 5028, a meticulous plant  
304 pathogen. Crude extract of isolate *B. amyloliquefaciens* 5NPA-1 (MT459305) was found to be most potent with zone  
305 of inhibition of 29 mm and 14 mm against *S. aureus* MCC 2043 and *X. campestris* NCIM 5028 respectively. Molecular  
306 networking using LC-MS/MS data of crude extract gave an idea about the presence of secondary metabolites  
307 encrypted in the strain *B. amyloliquefaciens* 5NPA-1 indicating surfactin type compounds. High potency of crude  
308 extract served as a driving force for purification of bioactive compounds to identify its potential as strong antimicrobial  
309 agents. Following that paradigm, purification and characterization of active compounds from *B. amyloliquefaciens*  
310 5NPA-1 was also performed leading to compounds 1–3 belonging to lipopeptides class. Lipopeptides form an  
311 important class of metabolites from endophytic bacteria, wherein serving as antibiotic and inducing plant systemic  
312 resistance. *B. amyloliquefaciens* was recognized as a higher lipopeptide producer when isolated from different plants  
313 including *Phaseolus vulgaris*, *Oryza sativa*, *Ophiopogon japonicus*, *Musa acuminata*, marine plants etc., meanwhile

314 also secreting plant growth promoters, phyto-hormones, siderophores, antifungal, anticancer and antimicrobial agents  
315 [36]. Diversity of endophytes within plant structures is proportional to various benefits of plant-microbe interactions.  
316 Such interactions are of ecological importance as they improve adaptation capabilities of either species and improve  
317 soil fertility and texture. An understanding of the chemical ecology of plants-microorganisms should enable the  
318 development of new crop improvement strategies, the conservation of indigenous varieties, and definitely a source of  
319 interesting pharmaceutical compounds.

320 To conclude, present study was the first attempt where endophytic bacterial community residing in stress-tolerant  
321 halophyte *S. brachiata* was studied and examined for the production of antimicrobial compounds against pathogens  
322 of various niches. Through identification of 20 % isolates, it was revealed that the plant harbors a rich bacterial  
323 biodiversity accounting for 13 genera and 29 species with *Bacillus* being dominant and distinct actinobacteria  
324 exhibiting different morphology, producing pigments, metabolites and polysaccharides which benefits the plant.  
325 Metabolites from species inhabiting the plant have history in supporting the host plant through various chemical  
326 interactions. It was also deciphered that surfactin class molecules produced by endophytic strain *B. amyloliquefaciens*  
327 5NPA-1 possess high biocontrol properties against nosocomial pathogen and bacterial plant pathogen. *Bacillus*  
328 *amyloliquefaciens* being an environmentally stable and fast replicating bacteria serves as an ideal source for extraction  
329 of plethora of metabolites. Such enormous antimicrobial potencies displayed by several endophytes from *S. brachiata*  
330 indicate their role in plant defense system, and serve as an example of plant microbe interaction. This diverse  
331 population can be further explored for novel metabolites given that demand for novel bioactive agents is everlasting  
332 and it may help us with better understanding the chemical ecology of an ecosystem.

### 333 **Data Availability Statement**

334 The datasets generated for this study are available on request to corresponding author.

### 335 **Conflict of Interest**

336 *The authors declare that the research was conducted in the absence of any commercial or financial relationships that*  
337 *could be construed as a potential conflict of interest.*

### 338 **Author Contributions**

339 Sanju Singh, Vishal Ghadge, Pankaj Kumar, and Pramod B. Shinde designed and planned the research. Sanju Singh,  
340 Vishal Ghadge, and Pankaj Kumar isolated and identified the bacterial strains. Sanju Singh and Doniya Elze Mathew  
341 performed bioactivity. Pankaj Kumar performed molecular networking analysis. Sanju Singh, Asmita Dhimmari,  
342 Pankaj Kumar, Harshal Sahastrabudhe, and Yedukondalu Nalli isolated and identified bioactive secondary  
343 metabolites. All authors analyzed and interpreted the results and commented on the manuscript prepared by Sanju  
344 Singh and Pramod B. Shinde.

### 345 **Funding**

346 This research was supported by Scientific and Engineering Research Board (SERB), Department of Science and  
347 Technology [ECRA/2016/000788 and EEQ/2016/000268]; and Council of Scientific and Industrial Research  
348 [MLP/0027].

### 349 **Acknowledgments**

350 Sanju Singh, Doniya Elze Mathew, Asmita Dhimmar acknowledges CSIR-JRF fellowship from Council of Scientific  
351 and Industrial Research (CSIR), Pankaj Kumar acknowledges DBT-JRF fellowship from Department of  
352 Biotechnology (DBT) and Harshal Sahastrabudhe acknowledges GATE-JRF fellowship from Council of Scientific  
353 and Industrial Research (CSIR). Yedukondalu Nalli acknowledges Scientific and Engineering Research Board  
354 (SERB) for providing National Postdoctoral Fellowship (N-PDF).

### 355 **Supplementary Material**

356 A schematic diagrams of isolation of endophytes and compounds, HPLC chromatograms, fragmentation pattern, and  
357 MS- and MS/MS-spectra of compounds **1–3** is available.

### 358 **REFERENCES**

- 359 1. Palazzotto E and Weber T (2018) Omics and multi-omics approaches to study the biosynthesis of secondary  
360 metabolites in microorganisms. *Curr Opin Microbiol* 45:109-116. doi:10.1016/j.mib.2018.03.004
- 361 2. Glick BR (2012) Plant growth-promoting bacteria: mechanisms and applications. *Scientifica*.  
362 doi:10.6064/2012/963401
- 363 3. Ryan RP, Germaine K, Franks A, Ryan DJ, Dowling DN (2008) Bacterial endophytes: recent developments and  
364 applications. *FEMS Microbiol Lett* 278:1-9 doi: 10.1111/j.1574-6968.2007.00918.x
- 365 4. Keller NP, Turner G, Bennett JW (2005) Fungal secondary metabolism from biochemistry to genomics. *Nat Rev*  
366 *Microbiol* 3:937-947 doi: 10.1038/nrmicro1286
- 367 5. Gaiero JR, McCall CA, Thompson KA, Day NJ ,Best AS, Dunfield KE (2013) Inside the root microbiome:  
368 bacterial root endophytes and plant growth promotion. *Am J Bot* 100:1738-1750. doi: 10.3732/ajb.1200572
- 369 6. Medema MH and Fischbach MA (2015) Computational approaches to natural product discovery. *Nat Chem Biol*  
370 11:639-648. Doi:10.1038/nchembio.1884
- 371 7. Santos ML, Berlitz DL, Wiest SLF, Schunemann R, Knaak N, Fiuza LM (2018). Benefits Associated with the  
372 Interaction of Endophytic Bacteria and Plants. *Braz Arch Biol Techn* 61. doi:10.1590/1678-4324-2018160431
- 373 8. Flowers TJ, Colmer TD (2008). Salinity tolerance in halophytes. *New Phytology* 179:945-963. doi:  
374 10.1111/j.1469-8137.2008.02531.x
- 375 9. Rodriguez-Llorente ID, Pajuelo E, Navarro-Torre S, Mesa-Marin J, Caviedes MA (2019) Bacterial Endophytes  
376 from Halophytes: How Do They Help Plants to Alleviate Salt Stress? *Saline Soil-Based Agriculture by*  
377 *Halotolerant Microorganisms*, 147–160. doi:10.1007/978-981-13-8335-9\_6
- 378 10. You YH, Yoon H, Kang SM, Shin JH, Choo YS, Lee IJ, et al (2012). Fungal diversity and plant growth promotion  
379 of endophytic fungi from six halophytes in Suncheon Bay. *J Microbiol Biotechnol*, 22:1549-1556.  
380 doi: 10.4014/jmb.1205.05010
- 381 11. Jiao R, Munir S, He P, Yang H, Wu Y, Wang J, et al (2019). Biocontrol potential of the endophytic *Bacillus*  
382 *amyloliquefaciens* YN201732 against tobacco powdery mildew and its growth promotion. *Biol Control*, 104160.  
383 doi:10.1016/j.biocontrol.2019.104160
- 384 12. Shahzad R, Khan AL, Bilal S, Asaf S, Lee IJ (2017). Plant growth-promoting endophytic bacteria versus  
385 pathogenic infections: an example of *Bacillus amyloliquefaciens* RWL-1 and *Fusarium oxysporum* f. sp.  
386 *lycopersici* in tomato. *PeerJ*, 5, e3107. doi: 10.7717/peerj.3107

- 387 13. Patel S (2016) *Salicornia*: evaluating the halophytic extremophile as a food and a pharmaceutical candidate. 3  
388 Biotech 6:1-10. doi:10.1007/s13205-016-0418-6
- 389 14. Abbas H, Patel RM, Parekh VB (2018) Culturable endophytic bacteria from halotolerant *Salicornia brachiata* L.  
390 Isolation and plant growth promoting traits. Ind J Applied Microbiol 21:10-21.
- 391 15. Karnwal A (2019) Screening, isolation and characterization of culturable stress-tolerant bacterial endophytes  
392 associated with *Salicornia brachiata* and their effect on wheat (*Triticum aestivum* L.) and maize (*Zea mays*)  
393 growth. J Plant Prot Res 59:293-303. doi:10.24425/jppr.2019.129747
- 394 16. Qin S, Li J, Chen HH, Zhao GZ, Zhu WY, Jiang CL, et al (2009) Isolation, diversity, and antimicrobial activity  
395 of rare actinobacteria from medicinal plants of tropical rain forests in Xishuangbanna, China. Appl Environ  
396 Microbiol 75:6176-6186. doi: 10.1128/aem.01034-09
- 397 17. Kieser T, Bibb MJ, Buttner, MJ, Chater KF, Hopwood DA (2000) *Practical Streptomyces Genetics* (Vol. 291).  
398 Norwich: John Innes Foundation.
- 399 18. Hall TA (1999) BioEdit: a user-friendly biological sequence alignment editor and analysis program for Windows  
400 95/98/NT. Nucl Acids Symp Ser 41:95-98.
- 401 19. Tamura K, Stecher G, Peterson D, Filipksi A, Kumar S (2013) MEGA6: molecular evolutionary genetics analysis  
402 version 6.0. Mol Biol Evol 30:2725-2729. doi: 10.1093/molbev/mst197
- 403 20. Qadri M, Rajput R, Abidin MZ, Vishwakarma RA, Hassan SR (2014) Diversity, molecular phylogeny, and  
404 bioactive potential of fungal endophytes associated with Himalayan blue pine (*Pinus wallichiana*). Microb Ecol  
405 67:877-887. doi: 10.1007/s00248-014-0379-4
- 406 21. Balouiri M, Sadiki M, Ibsouda SK (2016) Methods for in vitro evaluating antimicrobial activity: a review. J  
407 Pharm Anal 6:71-79. doi: 10.1016/j.jpha.2015.11.005
- 408 22. Patel JB, Tenover FC, Turnidge JD, Jorgensen JH (2011) Susceptibility test methods: dilution and disk diffusion  
409 methods. In *Manual of Clinical Microbiology, 10th Edition* (pp. 1122–1143). American Society of Microbiology.
- 410 23. Wang M, Carver JJ, Phelan VV, Sanchez LM, Garg N, Peng Y, et al (2016) Sharing and community curation of  
411 mass spectrometry data with Global Natural Products Social Molecular Networking. Nat Biotechnol 34:828-837.  
412 doi:101038/nbt.3597
- 413 24. Chambers MC, Maclean B, Burke R, Amodei D, Ruderman DL, Neumann S, et al (2012) A cross-platform toolkit  
414 for mass spectrometry and proteomics. Nat Biotechnol 30:918-920. doi:10.1038/nbt.2377
- 415 25. Shannon P, Markiel A, Ozier O, Baliga NS, Wang JT, Ramage D, et al (2003) Cytoscape: a software environment  
416 for integrated models of biomolecular interaction networks. Genome Res 13:2498-2504. doi:10.1101/gr.1239303
- 417 26. Valle DL, Puzon JJM, Cabrera EC, Rivera WL (2016) Thin layer chromatography bioautography and gas  
418 chromatography-mass spectrometry of antimicrobial leaf extracts from Philippine *Piper betel* L. against  
419 multidrug-resistant bacteria. Evid Based Complement Alternat Med 2016:1-7. doi: 10.1155/2016/4976791
- 420 27. Lee JH, Nam SH, Seo WT, Yun HD, Hong SY, Kim MK, et al (2012) The production of surfactin during the  
421 fermentation of cheonggukjang by potential probiotic *Bacillus subtilis* CSY191 and the resultant growth  
422 suppression of MCF-7 human breast cancer cells. Food Chem 131:1347-1354. doi:  
423 10.1016/j.foodchem.2011.09.133

- 424 28. Tang J S, Gao H, Hong K, Yu Y, Jiang MM, Lin HP, et al (2007) Complete assignments of <sup>1</sup>H and <sup>13</sup>C NMR  
425 spectral data of nine surfactin isomers. *Magn Reson Chem* 45:792-796. doi:10.1002/mrc.2048
- 426 29. Pang X, Zhao J, Fang X, Liu H, Zhang Y, Cen S et al (2017) Surfactin derivatives from *Micromonospora* sp.  
427 CPCC 202787 and their anti-HIV activities. *J Antibiot* 70:105-108. doi:10.1038/ja.2016.63
- 428 30. Sgroy V, Cassan F, Masciarelli O, Del Papa MF, Luna V (2009) Isolation and characterization of endophytic  
429 plant-growth promoting (PGPB) or stress homeostasis-regulating bacteria (PSHB) associated to the halophyte  
430 *Prosopis strombulifera*. *Appl Microbiol Biotechnol* 85:371-381. doi: 10.1007/s00253-009-2116-3
- 431 31. Navarro-Torre S, Barcia-Piedras JM, Mateos-Naranjo E, Redondo-Gomez S, Camacho M et al (2016). Assessing  
432 the role of endophytic bacteria in the halophyte *Arthrocnemum macrostachyum* salt tolerance. *Plant Biol* 19:249–  
433 256. doi:10.1111/plb.12521
- 434 32. Zhao S, Zhou N, Zhao ZY, Zhang K, Wu GH, Tian CY (2016) Isolation of endophytic plant growth-promoting  
435 bacteria associated with the halophyte *Salicornia europaea* and evaluation of their promoting activity under salt  
436 stress. *Curr Microbiol* 73:574–581. doi:10.1007/s00284-016-1096-7
- 437 33. Yaish MW, Antony I, Glick BR 2015. Isolation and characterization of endophytic plant growth-promoting  
438 bacteria from date palm tree (*Phoenix dactylifera* L.) and their potential role in salinity tolerance. *Anton Leeuw*  
439 *Int J G* 107:1519–1532.
- 440 34. Szymanska S, Plociniczak T, Piotrowska-Seget Z, Hryniewicz K (2016) Endophytic and rhizosphere bacteria  
441 associated with the roots of the halophyte *Salicornia europaea* L. community structure and metabolic  
442 potential. *Microbiol res* 192:37-51. doi: 10.1016/j.micres.2016.05.012
- 443 35. Beneduzi A, Ambrosini A, Passaglia LMP (2012) Plant growth-promoting rhizobacteria (PGPR): Their potential  
444 as antagonists and biocontrol agents. *Genet Mol Biol* 35:1044-1051. doi: 10.1590/s1415-47572012000600020
- 445 36. Ek-Ramos MJ, Gomez-Flores R, Orozco-Flores AA, Rodriguez-Padilla C, Gonzalez-Ochoa G, Tamez-  
446 Guerra P (2019) Bioactive products from plant-endophytic gram-positive bacteria. *Front Microbiol* 10:1-  
447 12. doi:10.3389/fmicb.2019.00463
- 448 37. Mesa J, Mateos-Naranjo E, Caviedes MA, Redondo-Gomez S, Pajuelo E, Rodriguez-Llorente ID (2015)  
449 Endophytic cultivable bacteria of the metal bioaccumulator *Spartina maritima* improve plant growth but not metal  
450 uptake in polluted marshes soils. *Front microbiol* 6:1450. <https://doi.org/10.3389/fmicb.2015.01450>
- 451 38. Tseng M, Liao HC, Chiang WP, Yuan GF (2011) *Isoptericola chiayiensis* sp. nov., isolated from mangrove  
452 soil. *Int J Syst Evol Microbiol* 61:1667-1670. doi: 10.1099/ijs.0.022491-0.
- 453 39. Cornell CR, Marasini D, Fakhr MK (2018) Molecular characterization of plasmids harbored by actinomycetes  
454 isolated from the great salt plains of oklahoma using PFGE and next generation whole genome sequencing. *Front*  
455 *Microbiol* 9:2282. doi: 10.3389/fmicb.2018.02282.
- 456 40. Pukall R, Gehrich-Schroter G, Lapidus A, Nolan M, Glavina Del Rio T et al (2009) Complete genome sequence  
457 of *Jonesia denitrificans* type strain (Prevot 55134). *Stand Genomic Sci* 1:262-269. doi:10.4056/sigs.41646
- 458 41. Passari AK, Mishra VK, Singh G, Singh P, Kumar B, Gupta VK, et al (2017) Insights into the functionality of  
459 endophytic actinobacteria with a focus on their biosynthetic potential and secondary metabolites production. *Sci*  
460 *Rep* 1:7. doi:10.1038/s41598-017-12235-4

- 461 42. Verma VC *et al* (2209) Endophytic actinobacteria from *Azadirachta indica*.juss.:Isolation, diversity, and anti-  
462 microbial activity. *Microb. Ecol.* **57**, 749-756. doi: 10.1007/s00248-008-9450-3.
- 463 43. Ramadoss D, Lakkineni VK, Bose P, Pranita B, Sajad A, Kannepalli A (2013) Mitigation of salt stress in wheat  
464 seedlings by halotolerant bacteria isolated from saline habitats. *SpringerPlus* 2:6 [http://dx.doi.org/10.1186/2193-](http://dx.doi.org/10.1186/2193-1801-2-6)  
465 1801- 2-6.
- 466 44. Jasim B, Sreelakshmi KS, Mathew J, Radhakrishnan EK (2016). Surfactin, iturin, and fengycin biosynthesis by  
467 endophytic *Bacillus* sp. from *Bacopa monnieri*. *Microb ecol* 72:106-119. doi: 10.1007/s00248-016-0753-5.
- 468  
469

470 **Table I** Location, Pre-treatments and Media used in the study.

471

| <b>Sites of sampling</b> | <b>Pre-treatments</b>                                                                       | <b>Media</b>                             |
|--------------------------|---------------------------------------------------------------------------------------------|------------------------------------------|
| 1. <b>New port</b>       | 1. Sample grinded by mortar pestle, diluted and spread.                                     | 1. Nutrient Agar (NA)                    |
| 2. <b>Sartanpar port</b> |                                                                                             | 2. Zobell Marine agar (ZMA)              |
| 3. <b>Victor port</b>    | 2. Moist incubation of grinded sample with CaCO <sub>3</sub> for 7-14 days and then spread. | 3. Tryptic Soya agar (TSA)               |
|                          | 3. Rehydration and centrifugation method.                                                   | 4. Starch Casein Agar (SCA)              |
|                          | 4. Dry heating the plant at 80-100 °C.                                                      | 5. Yeast Malt Agar (ISP 2)               |
|                          | 5. Treatment with 1.5% (w/v) phenol.                                                        | 6. Actinomycetes isolation agar (AIA)    |
|                          | 6. Treatment with 0.01% potassium dichromate.                                               | 7. Inorganic Salts Starch agar 4 (ISP 4) |
|                          |                                                                                             | 8. Tap water Yeast Extract Agar (TWYA)   |

472

473



474  
475

**Table II** Identification and similarity values of 16S rDNA sequences retrieved from the endophytic bacteria from *S. brachiata*

| S.no. | Isolates   | Identification                     | Accession number | Closest bacteria in database                | Similarities (%) |
|-------|------------|------------------------------------|------------------|---------------------------------------------|------------------|
| 1     | NPROOT-3   | <i>Bacillus subtilis</i>           | MT459325         | <i>B. subtilis</i> NR_027552                | 99.86            |
| 2     | NPB-5      | <i>B. subtilis</i>                 | MT645716         | <i>B. subtilis</i> NR_027552                | 99.93            |
| 3     | NPA-10     | <i>B. tequilensis</i>              | MT645715         | <i>B. tequilensis</i> NR_104919             | 99.86            |
| 4     | NPA-4      | <i>B. subtilis</i>                 | MT645714         | <i>B. subtilis</i> NR_027552                | 99.93            |
| 5     | 1VPT1-5    | <i>Pseudomonas parafulva</i>       | MT645710         | <i>Pseudomonas parafulva</i> NR_104280      | 99.86            |
| 6     | 1VPT5-7    | <i>B. infantis</i>                 | MT645711         | <i>B. infantis</i> NR_043267                | 99.63            |
| 7     | 1VPT5-10   | <i>B. infantis</i>                 | MT645712         | <i>B. infantis</i> NR_043267                | 99.63            |
| 8     | 2VPT5-4    | <i>Pseudomonas cremoricolorata</i> | MT645713         | <i>Pseudomonas cremoricolorata</i> NR113855 | 100              |
| 9     | 4NPA-2     | <i>B. safensis</i>                 | MT645719         | <i>B. safensis</i> NR_041794                | 99.79            |
| 10    | 4NPA-4     | <i>Paenibacillus taichungensis</i> | MT645718         | <i>Paenibacillus taichungensis</i> MH553940 | 99.29            |
| 11    | 4SPS-3     | <i>Nocardiopsis aegyptia</i>       | MT645720         | <i>Nocardiopsis aegyptia</i> NR025889       | 99.71            |
| 12    | 4SPT4-10   | <i>B. safensis</i>                 | MT645721         | <i>B. safensis</i> NR_041794                | 99.78            |
| 13    | 4SPT4-14   | <i>B. safensis</i>                 | MT645722         | <i>B. safensis</i> NR_041794                | 99.93            |
| 14    | 4SPT4-16   | <i>B. safensis</i>                 | MT645723         | <i>B. safensis</i> NR_041794                | 99.79            |
| 15    | 4SPT6-1    | <i>B. safensis</i>                 | MT645724         | <i>B. safensis</i> NR_041794                | 100%             |
| 16    | 4SPT6-1A   | <i>B. zhangzouensis</i>            | MT645725         | <i>B. safensis</i> NR_041794                | 99.79            |
| 17    | 4SPT8-2    | <i>B. filamentosus</i>             | MT645726         | <i>B. filamentosus</i> NR_134701            | 99.64            |
| 18    | 4SPT8-6A   | <i>B. subtilis</i>                 | MT645727         | <i>B. subtilis</i> NR_113265                | 99.93            |
| 19    | 4SPT12-17  | <i>B. aerius</i>                   | MT645728         | <i>B. aerius</i> NR_118439                  | 99.86            |
| 20    | 4VPT1-4    | <i>Isoptericola chiayiensis</i>    | MT645729         | <i>Isoptericola chiayiensis</i> NR_116696   | 99.05            |
| 21    | 4VPT1-8    | <i>Isoptericola chiayiensis</i>    | MT645730         | <i>Isoptericola chiayiensis</i> NR_116696   | 99.20            |
| 22    | 4VPT1-9    | <i>B. subtilis</i>                 | MT645731         | <i>B. subtilis</i> NR_027552                | 99.35            |
| 23    | 4VPT4-5    | <i>B. tequilensis</i>              | MT645732         | <i>B. tequilensis</i> NR_104919             | 99.86            |
| 24    | 4VPT5-1    | <i>B. pumilus</i>                  | MT645733         | <i>B. pumilus</i> NR_043242                 | 99.71            |
| 25    | 4VPT5-1A   | <i>B. zhangzhouensis</i>           | MT645717         | <i>B. zhangzhouensis</i> NR_148786          | 99.35            |
| 26    | 5NPA-1     | <i>B. amyloliquefaciens</i>        | MT459305         | <i>B. amyloliquefaciens</i> NR_041455       | 98.91            |
| 27    | 5SPRroot-1 | <i>B. paralicheniformis</i>        | MT645735         | <i>B. paralicheniformis</i> MK517555        | 99.93            |
| 28    | 5NPB-5     | <i>B. aerius</i>                   | MT645734         | <i>B. aerius</i> NR_118439                  | 99.78            |
| 29    | 5SPS-3     | <i>Rhodococcus ruber</i>           | MT645737         | <i>Rhodococcus ruber</i> NR_118602          | 99.93            |
| 30    | 5SPT4-2    | <i>B. tequilensis</i>              | MT645738         | <i>B. tequilensis</i> NR_104919             | 99.71            |
| 31    | 5SPT7-2    | <i>B. paralicheniformis</i>        | MT645740         | <i>B. paralicheniformis</i> MF_321822       | 99.93            |
| 32    | 5SPROOT 3  | <i>B. stratosphericus</i>          | MT645736         | <i>B. stratosphericus</i> NR_118441         | 99.93            |
| 33    | 5SPT4-2A   | <i>B. paralicheniformis</i>        | MT645739         | <i>B. paralicheniformis</i> MK517555        | 99.86            |
| 34    | 5SPT7-7    | <i>B. tequilensis</i>              | MT645741         | <i>B. tequilensis</i> NR_104919             | 99.86            |
| 35    | 5SPT8-5A   | <i>B. tequilensis</i>              | MT645742         | <i>B. tequilensis</i> NR_104919             | 99.86            |

|    |            |                                          |          |                                                    |       |
|----|------------|------------------------------------------|----------|----------------------------------------------------|-------|
| 36 | 5VPT7-8    | <i>B. paralicheniformis</i>              | MT645746 | <i>B. paralicheniformis</i> MF321822               | 99.93 |
| 37 | 5VPT11-1   | <i>Bacillus endophyticus</i>             | MT645748 | <i>Bacillus endophyticus</i> KY194734              | 98.8% |
| 38 | 5VPT1-11   | <i>B. tequilensis</i>                    | MT645744 | <i>B. tequilensis</i> NR_104919                    | 99.86 |
| 39 | 5VPT4-11   | <i>B. subtilis</i>                       | MT645745 | <i>B. subtilis</i> NR_113265                       | 99.86 |
| 40 | 5VPT7-10   | <i>B. subtilis</i>                       | MT645747 | <i>B. subtilis</i> NR_112629                       | 99.93 |
| 41 | 5VPT1-13   | <i>B. subtilis</i>                       | MT645743 | <i>B. subtilis</i> NR_113265                       | 99.72 |
| 42 | 6SPT2-1    | <i>Marinilactibacillus piezotolerans</i> | MT645751 | <i>Marinilactibacillus piezotolerans</i> NR_112661 | 99.56 |
| 43 | 6NPB-8     | <i>Salinicola tamaricis</i>              | MT645750 | <i>Salinicola tamaricis</i> NR_157001              | 99.34 |
| 44 | 6SPT4-14   | <i>B. subtilis</i>                       | MT645755 | <i>B. subtilis</i> NR_113265                       | 99.79 |
| 45 | 6SPT7-1    | <i>B. safensis</i>                       | MT645752 | <i>B. safensis</i> NR_041794                       | 99.65 |
| 46 | 6SPT12-11  | <i>Nitratireductor indicus</i>           | MT645754 | <i>Nitratireductor indicus</i> NR_117518           | 99.55 |
| 47 | 6VPT1-2    | <i>B. safensis</i>                       | MT645756 | <i>B. safensis</i> NR_041794                       | 99.79 |
| 48 | 6VPT5-9    | <i>B. zhangzouensis</i>                  | MT645758 | <i>B. zhangzouensis</i> NR_148786                  | 99.50 |
| 49 | 6NPA-7     | <i>B. aerius</i>                         | MT645749 | <i>B. aerius</i> NR_118439                         | 99.64 |
| 50 | 6SPT8-3    | <i>Nitratireductor indicus</i>           | MT645753 | <i>Nitratireductor indicus</i> NR_117518           | 99.70 |
| 51 | 6VPT1-8    | <i>B. pumilus</i>                        | MT645757 | <i>B. safensis</i> NR_112637                       | 99.57 |
| 52 | 7NPA-13    | <i>B. stratosphericus</i>                | MT645759 | <i>B. stratosphericus</i> NR_118441                | 99.93 |
| 53 | 7NPB-1     | <i>B. stratosphericus</i>                | MT645760 | <i>B. stratosphericus</i> NR_042336                | 99.86 |
| 54 | 7NPB-2     | <i>Salinicola tamaricis</i>              | MT645761 | <i>Salinicola tamaricis</i> NR_157001              | 98.80 |
| 55 | 7VPT5-5R   | <i>Streptomyces hyderabadensis</i>       | MT645769 | <i>Streptomyces hyderabadensis</i> NR_116934       | 99.55 |
| 56 | 7NPSHOOT-4 | <i>B. subtilis</i>                       | MT645765 | <i>B. subtilis</i> NR_112629                       | 100   |
| 57 | 7NPB-3B    | <i>B. velezensis</i>                     | MT645763 | <i>B. velezensis</i> NR_116240                     | 99.78 |
| 58 | 7SPROOT-1  | <i>Enterococcus faecalis</i>             | MT645764 | <i>E. faecalis</i> NR_115765                       | 99.80 |
| 59 | 7SPT4-20   | <i>Enterococcus faecalis</i>             | MT645767 | <i>E. faecalis</i> NR_115765                       | 99.93 |
| 60 | 7SPT4-19   | <i>Jonesia denitrificans</i>             | MT645766 | <i>Jonesia denitrificans</i> NR_119162             | 99.78 |
| 61 | 7NPROOT-4  | <i>B. cereus</i>                         | MT645762 | <i>B. cereus</i> NR_115526                         | 99.51 |
| 62 | 7SPT5-13   | <i>Micromonospora echinospora</i>        | MT645768 | <i>Micromonospora echinospora</i> NR_118843        | 99.41 |
| 63 | 4NPBL      | <i>B. subtilis</i>                       | MT447880 | <i>B. subtilis</i> NR_112116                       | 99.86 |

477  
478  
479

**Table III** Diversity indices of the 63 endophytes isolated from *S. brachiata*

| <b>Diversity indices</b>       | <b>Values calculated</b> | <b>Range</b> |
|--------------------------------|--------------------------|--------------|
| Shannon-Wiener diversity index | 3.028                    | 0 onwards    |
| Simpson's index of diversity   | 0.931                    | 0-1          |
| Species richness               | 3.615                    | 0 onwards    |
| Shannon evenness               | 0.899                    | 0-1          |

480

481 **Table IV** Results of primary screening of endophytic isolates against microbial pathogens.  
482

| S N | Isolates    | Taxonomic identification                 | MS | SA | BS | EC | CA | XC | FO | AM |
|-----|-------------|------------------------------------------|----|----|----|----|----|----|----|----|
| 1   | NPA-4       | <i>Bacillus subtilis</i>                 |    |    |    |    |    |    |    |    |
| 2   | NPA-10      | <i>Bacillus tequilensis</i>              |    |    |    |    |    |    |    |    |
| 3   | NPB-5       | <i>Bacillus subtilis</i>                 |    |    |    |    |    |    |    |    |
| 4   | 2VPT4-2     |                                          |    |    |    |    |    |    |    |    |
| 5   | NP ROOT-3   | <i>Bacillus tequilensis</i>              |    |    |    |    |    |    |    |    |
| 6   | 2VPT11-1    |                                          |    |    |    |    |    |    |    |    |
| 7   | 4VPT1-8     | <i>Isoptericola chiayiensis</i>          |    |    |    |    |    |    |    |    |
| 8   | 4VPT1-9     | <i>Bacillus subtilis</i>                 |    |    |    |    |    |    |    |    |
| 9   | 4VPT1-4     | <i>Isoptericola chiayiensis</i>          |    |    |    |    |    |    |    |    |
| 10  | 4SPT4-14    | <i>Bacillus safensis</i>                 |    |    |    |    |    |    |    |    |
| 11  | 4SPT4-10    | <i>Bacillus safensis</i>                 |    |    |    |    |    |    |    |    |
| 12  | 4NPA-2      | <i>Bacillus safensis</i>                 |    |    |    |    |    |    |    |    |
| 13  | 4NPA-4      | <i>Paenibacillus taichungensis</i>       |    |    |    |    |    |    |    |    |
| 14  | 4NPB-1      |                                          |    |    |    |    |    |    |    |    |
| 15  | 4NPB-4A     |                                          |    |    |    |    |    |    |    |    |
| 16  | 4SPT4-16    | <i>Bacillus safensis</i>                 |    |    |    |    |    |    |    |    |
| 17  | 4SPT4-12    |                                          |    |    |    |    |    |    |    |    |
| 18  | 4SPT6-1A    | <i>Bacillus zhangzouensis</i>            |    |    |    |    |    |    |    |    |
| 19  | 4VPT4-5     | <i>Bacillus tequilensis</i>              |    |    |    |    |    |    |    |    |
| 20  | 4VPT5-1     | <i>Bacillus pumilus</i>                  |    |    |    |    |    |    |    |    |
| 21  | 4SPT8-6A    | <i>Bacillus subtilis</i>                 |    |    |    |    |    |    |    |    |
| 22  | 4SPT8-2     | <i>Bacillus filamentosus</i>             |    |    |    |    |    |    |    |    |
| 23  | 4SPS-1      |                                          |    |    |    |    |    |    |    |    |
| 24  | 4SPS-3      | <i>Nocardiopsis tangguensis</i>          |    |    |    |    |    |    |    |    |
| 25  | 4SPR-4      |                                          |    |    |    |    |    |    |    |    |
| 26  | 5VPT1-11    | <i>Bacillus subtilis</i>                 |    |    |    |    |    |    |    |    |
| 27  | 5NPA-1      | <i>Bacillus amyloliquefaciens</i>        |    |    |    |    |    |    |    |    |
| 28  | 5NPB-5      | <i>Bacillus aerius</i>                   |    |    |    |    |    |    |    |    |
| 29  | 5SPT4-9     |                                          |    |    |    |    |    |    |    |    |
| 30  | 5SPT4-8     |                                          |    |    |    |    |    |    |    |    |
| 31  | 5SPT4-1     |                                          |    |    |    |    |    |    |    |    |
| 32  | 5SPT4-2     | <i>Bacillus tequilensis</i>              |    |    |    |    |    |    |    |    |
| 33  | 5SPT6-1     |                                          |    |    |    |    |    |    |    |    |
| 34  | 5VPT1-13    | <i>Bacillus subtilis</i>                 |    |    |    |    |    |    |    |    |
| 35  | 5VPT1-3     |                                          |    |    |    |    |    |    |    |    |
| 36  | 5SPT7-2     | <i>Bacillus paralichenfiormis</i>        |    |    |    |    |    |    |    |    |
| 37  | 5SPT7-4     |                                          |    |    |    |    |    |    |    |    |
| 38  | 5SPT7-7     | <i>Bacillus tequilensis</i>              |    |    |    |    |    |    |    |    |
| 39  | 5SPT8-5A    | <i>Bacillus tequilensis</i>              |    |    |    |    |    |    |    |    |
| 40  | 5SPT10-5    |                                          |    |    |    |    |    |    |    |    |
| 41  | 5SP-Root-1  | <i>Bacillus paralichenfiormis</i>        |    |    |    |    |    |    |    |    |
| 42  | 5SP-ROOT-3  | <i>Bacillus stratosphericus</i>          |    |    |    |    |    |    |    |    |
| 43  | 5VPT4-11    | <i>Bacillus subtilis</i>                 |    |    |    |    |    |    |    |    |
| 44  | 5VPT7-2     | <i>Bacillus paralichenfiormis</i>        |    |    |    |    |    |    |    |    |
| 45  | 5SP-SHOOT-3 | <i>Rhodococcus ruber</i>                 |    |    |    |    |    |    |    |    |
| 46  | 5VPT7-8     | <i>Bacillus haynesii</i>                 |    |    |    |    |    |    |    |    |
| 47  | 5VPT11-1    | <i>Bacillus paralichenfiormis</i>        |    |    |    |    |    |    |    |    |
| 48  | 6SPT2-1     | <i>Marinilactibacillus peizotolerans</i> |    |    |    |    |    |    |    |    |
| 49  | 6NPA-7      | <i>Bacillus aerius</i>                   |    |    |    |    |    |    |    |    |
| 50  | 6SPT4-2     |                                          |    |    |    |    |    |    |    |    |
| 51  | 6SPT4-14    | <i>Bacillus subtilis</i>                 |    |    |    |    |    |    |    |    |
| 52  | 6SPT6-3     |                                          |    |    |    |    |    |    |    |    |



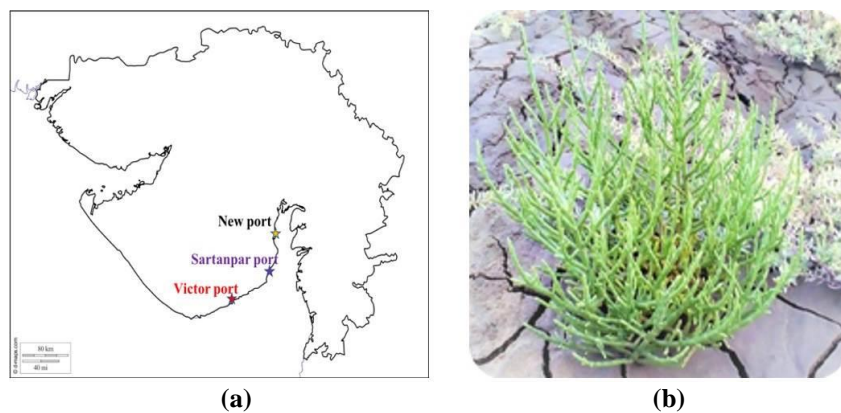

488  
489

490 **Fig. 1** Sampling location. (a) Location Map of Gujarat coast, India showing three sampling sites 1) New port, 2)  
491 Sartanpar port, 3) Victor port. (b) Morphology of *Salicornia brachiata* plant in natural marsh habitat

492

493

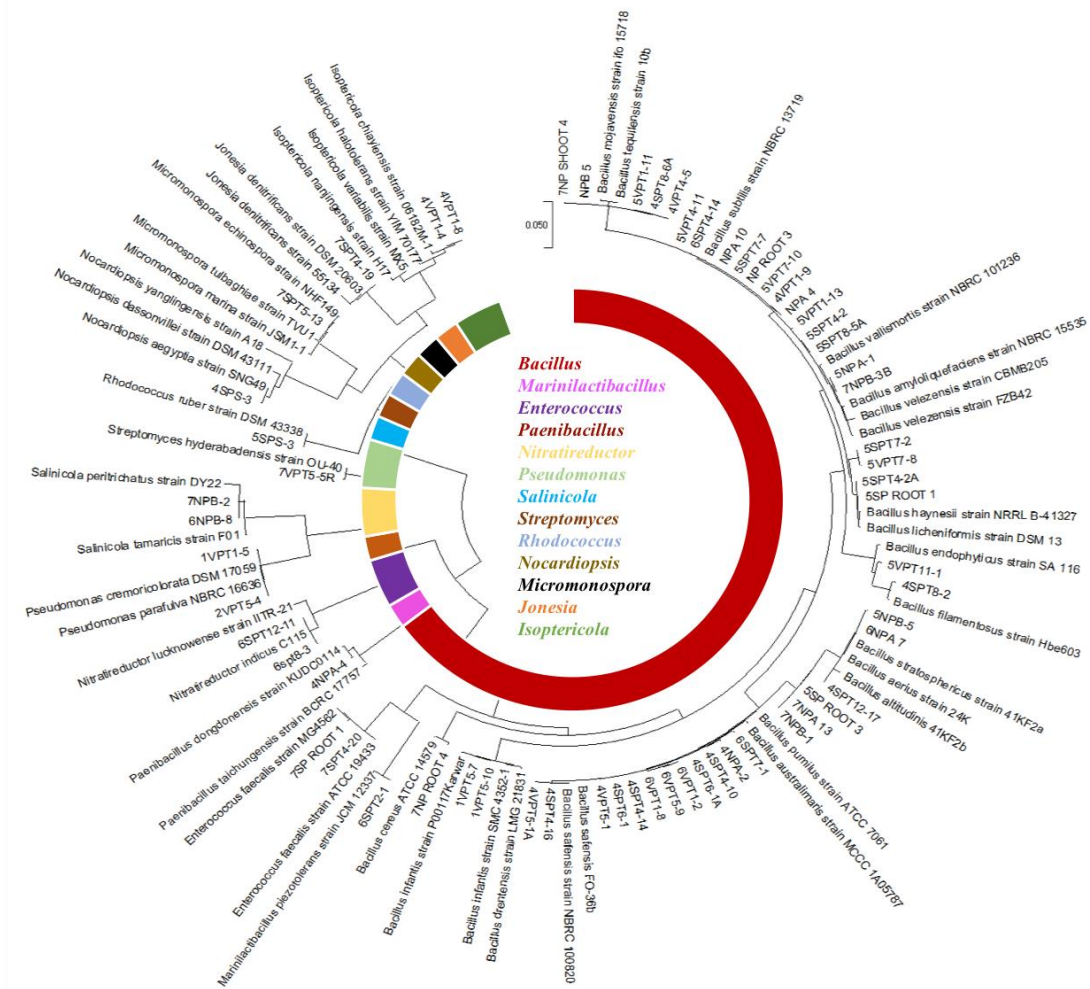

494  
495  
496  
497  
498

**Fig. 2** Identification of endophytes by 16S rRNA sequencing. Phylogenetic tree of 63 bioactive isolates obtained by Maximum likelihood analysis constructed using Mega 6 software depicting their phylogeny with related genera as well as pie graph displaying percentage distribution of genera obtained

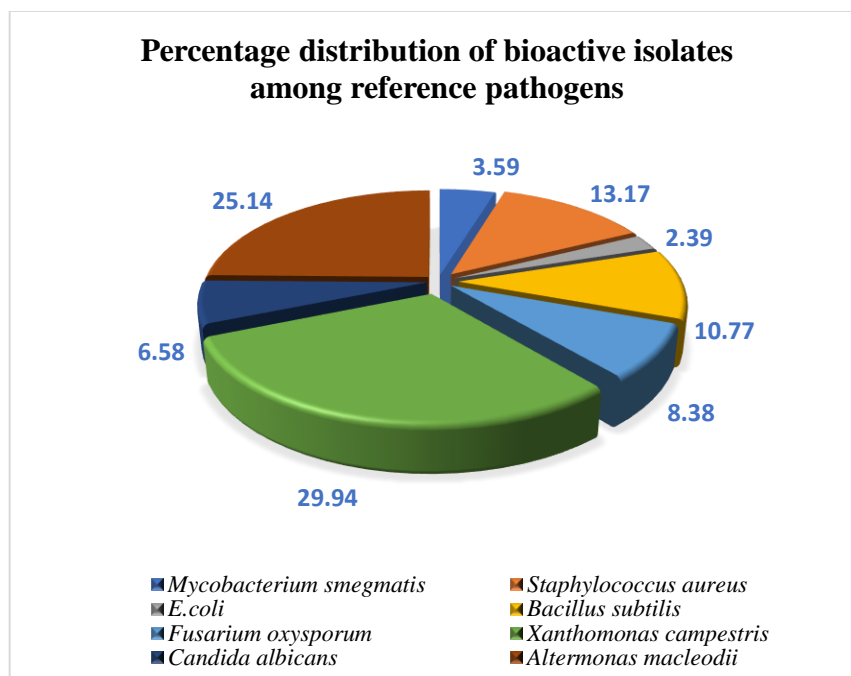

499  
500

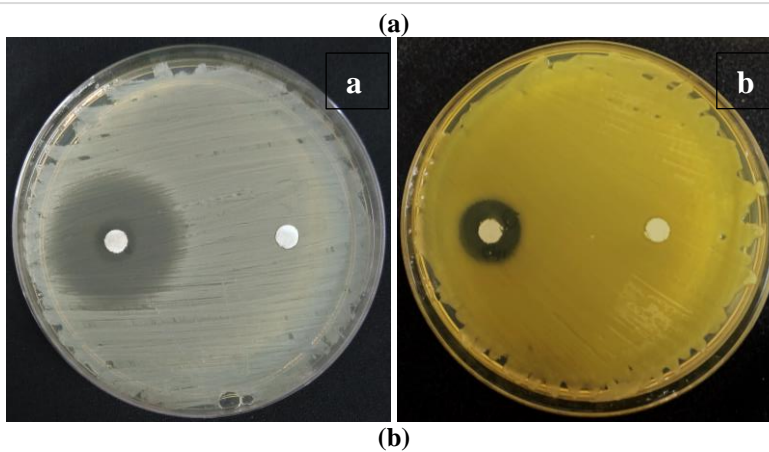

501  
502  
503  
504  
505  
506  
507  
508  
509

**Fig. 3** (a) Pie graph depicting distribution of isolates exhibiting bioactivity against various pathogens. (b) Bioactivity of *B. amyloliquefaciens* 5NPA-1 against (a) *S. aureus* MCC 2043 and (b) *X. campestris* NCIM 5028



510

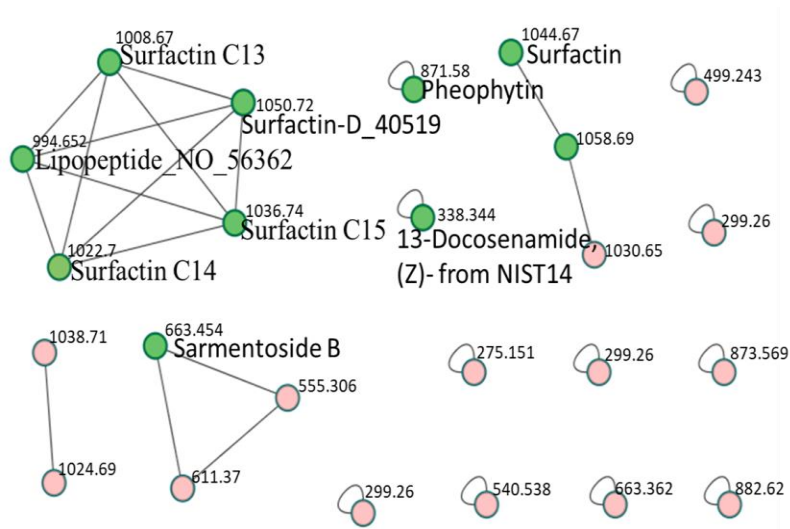

511  
512  
513  
514  
515  
516

**Fig. 4** Molecular network of *B. amyloliquefaciens* 5NPA-1. Annotated molecular network (green) by GNPS for crude extract identifies surfactin networks. Molecular weights beside nodes indicate mass of parent ions. Unidentified nodes (pink) were not automatically detected.

517  
518

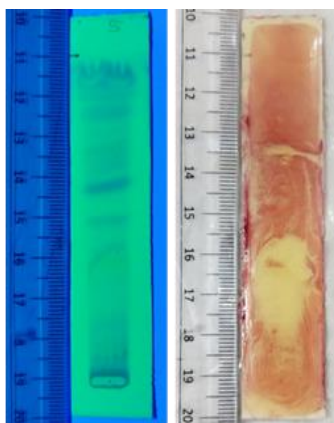

519 **Fig. 5** TLC bioautography plate of crude extract of *B. amyloliquefaciens* 5NPA-1. Pink area represents cell growth  
520 and clear zone area depicts presence of bioactive compound at that region  
521  
522

523  
524

525  
526  
527

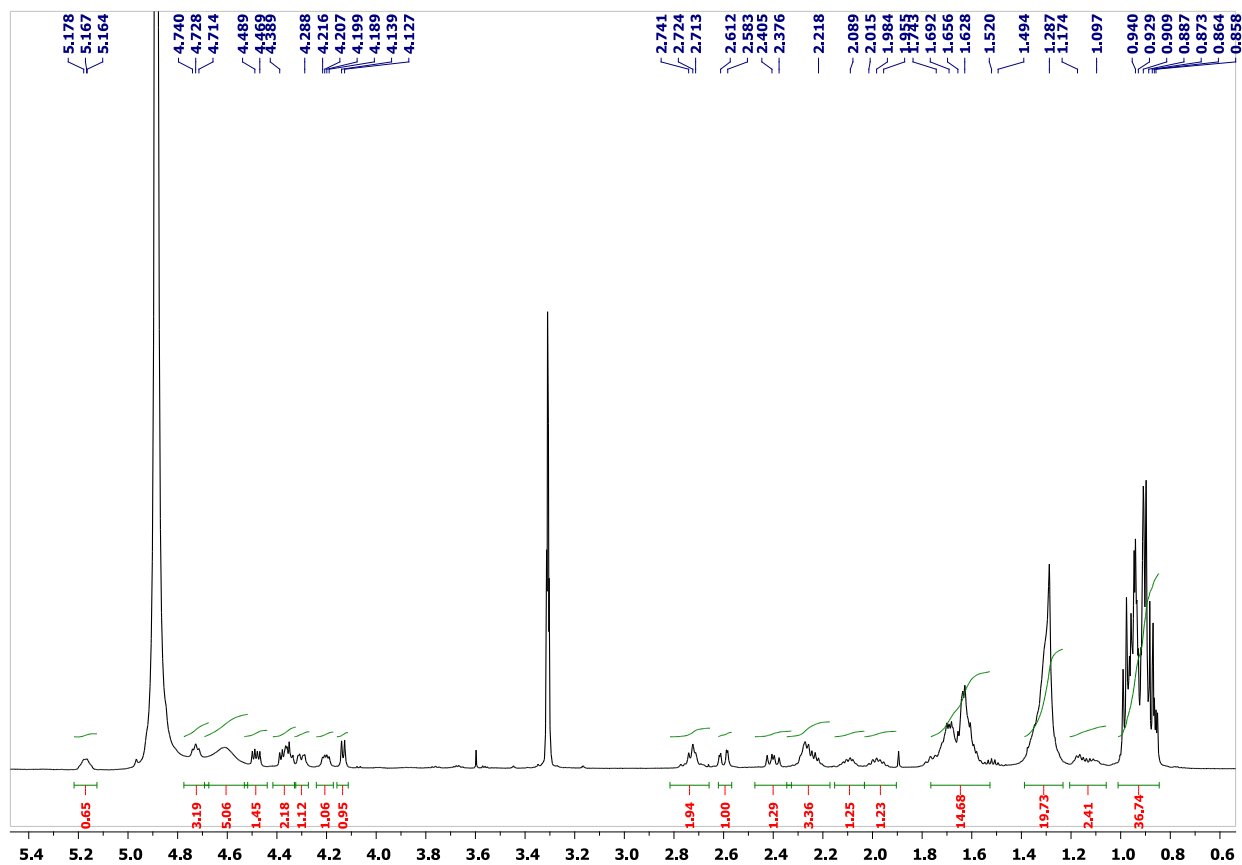

528  
529  
530  
531  
532  
533

**Fig. 6**  $^1\text{H-NMR}$  spectrum of 5-PTLC2 fraction obtained from preparative TLC of crude extract of *B. amyloliquefaciens* 5NPA-1

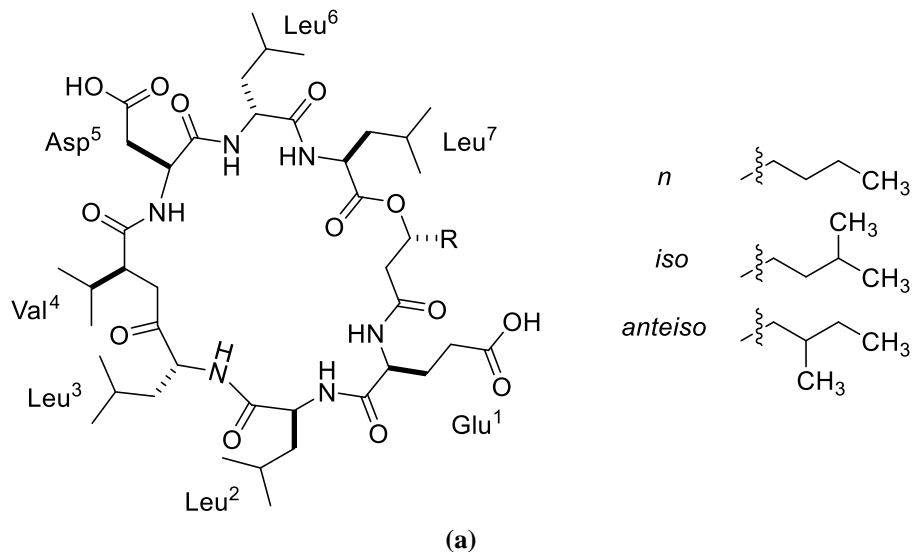

534  
535  
536

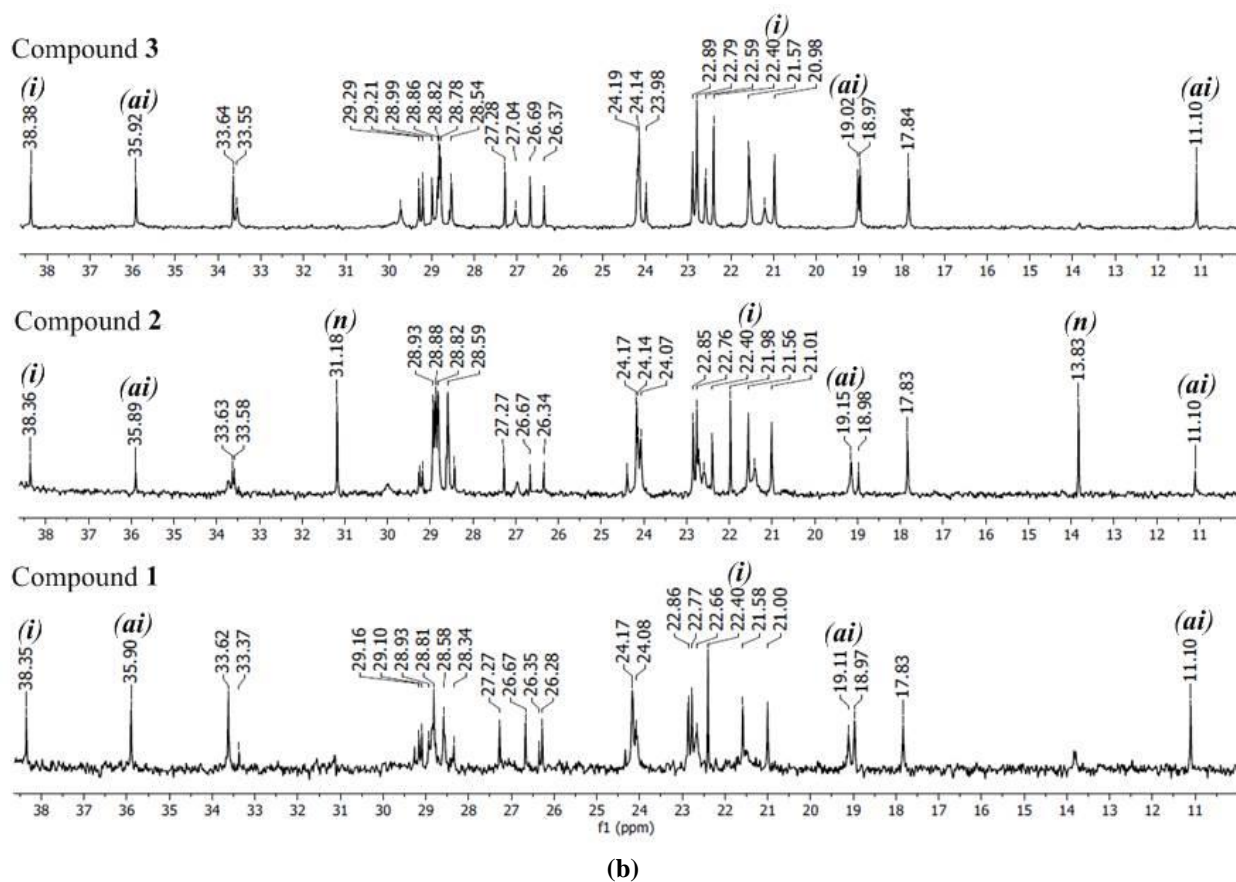

537  
538  
539  
540  
541  
542  
543  
544

**Fig. 7** (a) Structures of compounds **1** ( $R =$  mixture of *iso*- $C_{10}H_{21}$  and *anteiso*- $C_{10}H_{21}$  patterns), **2** ( $R =$  mixture of *n*- $C_{11}H_{23}$ , *iso*- $C_{11}H_{23}$ , and *anteiso*- $C_{11}H_{23}$  patterns), and **3** ( $R =$  mixture of *iso*- $C_{12}H_{25}$  and *anteiso*- $C_{12}H_{25}$  patterns). (b) Characteristic  $^{13}C$  NMR signals differentiating branching of the hydroxy fatty acid side chains in compounds 1–3; (n): normal ( $\delta_C$  13.8, 22.0, 31.2), (i): iso ( $\delta_C$  22.4, 22.4, 27.3, 38.4) and the (ai): anteiso ( $\delta_C$  11.1, and 19.0) chain type.
